# Supplementary material for: Transmissible plasma-evolved suspended graphene near room temperature
Source: Research Square preprint supplement (doi:10.21203/rs.3.rs-88971/v1), 2020-10-13
Supplement: Supplementary file 1 [file a2f18ff1a683c3b4c9c79f8f.docx]

**Supplementary Information**

**Transmissible plasma-evolved suspended graphene near room temperature**

Kamal Prasad Sharma1,2*, Aliza Khaniya Sharma1, Toru Asaka3,4, Takahiro Maruyama1,2*

1Department of Applied Chemistry, 2Nanomaterial Research Center,

Meijo University, Tempaku-ku, Nagoya 468-8502, Japan

3Department of Life Science and Applied Chemistry, 4Frontier Research Institute for

Materials Science,

Nagoya Institute of Technology, Showa-ku, Nagoya 466-8555, Japan

**Supplementary Fig. 1** Schematic of **a)** dual arc plasma system (APS), and **b)** negatively biased target used in APS source.


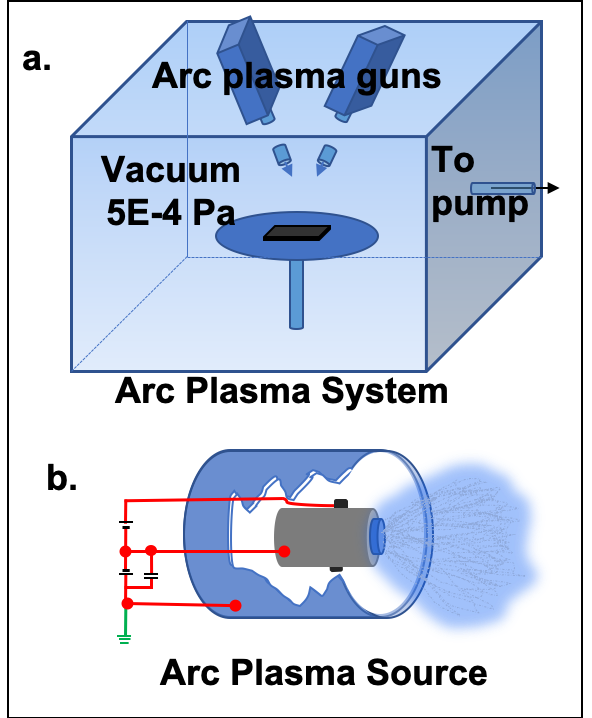


**Supplementary Fig. 2** TPEG utilizing PMMA support. **a)** OM image of graphene produced with **Protocol P4'_Ir** on SiO2/Si (PMMA was removed after transfer onto SiO2/Si using acetone), **b)** Raman spectra observed at various points (coloured spectra are assigned to their respective points in Fig. **2 (a)**). **c)** OM image (coloured) of graphene after transfer onto SiO2/Si.


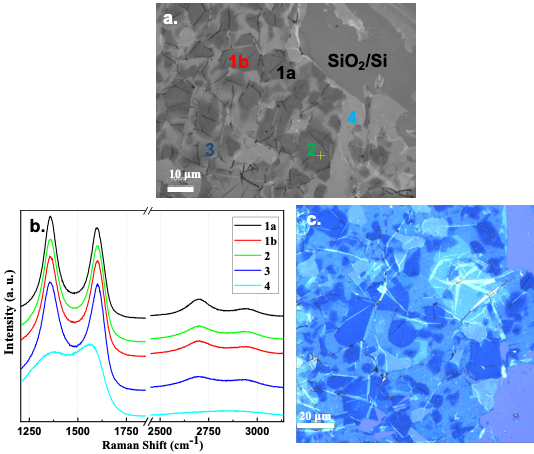


**Supplementary Fig. 3 a)** OM image of CVD graphene crystals transferred onto SiO2/Si (using the method reported elsewhere **34**). **b)** OM image of **Fig. 3a** after **Protocol P2_Ir** plasma. **c)** Typical Raman spectra of CVD graphene transferred onto SiO2/Si with different treatments, as indicated by their respective colours.


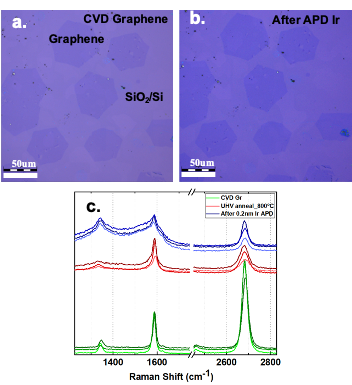


**Supplementary Table S1** Table showing the details of the **protocol**s employed in this research. Raman analysis was performed after pulsed APD of each **protocol** (see physical state of a-C mesh on TEM grids in **Extended Data** **Fig. 10**), graphene (Gr), Partial Gr, and No Gr were defined based on the frequency of observable 2D band in Raman spectra.

| **S. N.** | **Protocol** | **Element** | **Carbon source** | **APD conditions** | | | **Raman analysis** |
| --- | --- | --- | --- | --- | --- | --- | --- |
| **Voltage** | **Pulses** | **Frequency** |
| 1 | **P1_Co** | Co | a-C mesh of TEM grid | 70 | 3 | 3 | No Gr |
| 2 | **P2_Co** | 100 | 3 | 3 | Partial Gr |
| 3 | **P2'_Co** | 100 | 10 | 3 | Gr |
| 4 | **P3_Co** | 140 | 3 | 3 | Gr |
| 5 | **P4_Co** | 170 | 3 | 3 | Gr |
| 6 | **P5_Co** | 210 | 3 | 3 | Gr |
| 7 | **P6_Co** | 250 | 3 | 3 | Gr |
| 8 | **P1_Co+W** | W (+P1_Co) | 100 | 3 | 3 | No Gr |
| 9 | **P1'_Co+W** | 100 | 10 | 3 | Gr |
| 10 | **P2_Co+W** | 140 | 3 | 3 | Gr |
| 11 | **P3_Co+W** | 180 | 3 | 3 | Gr |
| 12 | **P4_Co+W** | 210 | 3 | 3 | Gr |
| 13 | **P3'_Co+W_500oC** | 180 | 3 | 3 | Gr |
| 14 | **P1_Ir** | Ir | 70 | 3 | 3 | No Gr |
| 15 | **P2_Ir** | 100 | 3 | 3 | Partial Gr |
| 16 | **P2'_Ir** | 100 | 10 | 3 | Gr |
| 17 | **P3_Ir** | 140 | 3 | 3 | Gr |
| 18 | **P4_Ir** | 170 | 3 | 3 | Gr |
| 19 | **P1_Pt** | Pt | 70 | 3 | 3 | No Gr |
| 20 | **P2_Pt** | 100 | 3 | 3 | Partial Gr |
| 21 | **P2'_Pt** | 100 | 10 | 3 | Gr |
| 22 | **P3_Pt** | 140 | 3 | 3 | Gr |
| 23 | **P4_Pt** | 170 | 3 | 3 | Gr |
| 24 | **P1_W** | W | 100 | 3 | 3 | No Gr |
| 25 | **P2_W** | 180 | 3 | 3 | Partial Gr |
| 26 | **P3_W** | 210 | 3 | 3 | Gr |
| 27 | **P4_W** | 250 | 3 | 3 | Gr |
| 28 | **P4'_Ir** | Ir | a-C on PMMA | 170 | 10 | 3 | Gr |
| 29 | **P4''_Ir** | 170 | 5 | 3 | Gr |
